# Supplementary material for: MRI-based hip cartilage measures in osteoarthritic and non-osteoarthritic individuals: a systematic review
Source: PubMed Central journal article supplement — RMD Open. 2017 Mar 22;3(1):e000358. doi: 10.1136/rmdopen-2016-000358 (PMC5372025; doi:10.1136/rmdopen-2016-000358), 2017-03-22
Supplement: rmdopen-2016-000358supp.pdf [file rmdopen-2016-000358supp.pdf]

## APPENDIX

Electronic search strategy for combining MEDLINE and EMBASE searches, without duplicate results. The number of records corresponding to each of these search elements is shown in parentheses. The search was conducted with the help of a librarian.

1. Hip/ (54235)
2. exp Hip Joint/ (67548)
3. hip\*1.ti,kf. or hip\*1.ab. /freq=2 (176804)
4. ((femur or femoral) adj2 head).ti,ab,kf. (28995)
5. exp Femur Head/ (20372)
6. or/1-5 (221470)
7. cartilage/ or hyaline cartilage/ or cartilage, articular/ (105927)
8. ((volume or loss or thickness or degenerat\*) and (measur\* or assess\* or evaluat\*)).mp. (1671060)
9. 7 and 8 (12178)
10. ((measur\* or assess\* or evaluat\* or volume or thickness or loss or degenerat\*) adj5 cartilage).mp. (29302)
11. 9 or 10 (33002)
12. 6 and 11 (1989)
13. limit 12 to english language (1820)
14. animals/ not (animals/ and humans/) (5391418)
15. 13 not 14 (1691)
16. 15 use ppez (573)

17. \*Hip/ (23107)
18. hip\*1.ti. or hip\*1.ab. /freq=2 (174373)
19. ((femur or femoral) adj2 head).ti,ab,kw. (28876)
20. exp \*Femur Head/ (9433)
21. or/17-20 (196415)
22. exp \*cartilage/ (81055)
23. ((volume or loss or thickness or degenerat\*) and (measur\* or assess\* or evaluat\*)).ti,ab,kw. (1440509)
24. 22 and 23 (9161)
25. cartilage degeneration/ (7057)
26. ((measur\* or assess\* or evaluat\* or volume or thickness or loss or degenerat\*) adj5 cartilage).ti,ab,kw. (25005)
27. 24 or 25 or 26 (34297)
28. 21 and 27 (1570)
29. limit 28 to english language (1425)
30. animal/ not (animal/ and human/) (5557106)
31. 29 not 30 (1317)
32. 31 use oemezd (819)
33. 16 or 32 (1392)
34. remove duplicates from 33 (977)
